# Supplementary figures and images for: Synergistic integration of Netrin and ephrin axon guidance signals by spinal motor neurons
Source: eLife journal article supplement (doi:10.7554/elife.10841), 2015-12-03

Figure 1 - Figure supplement 1

A

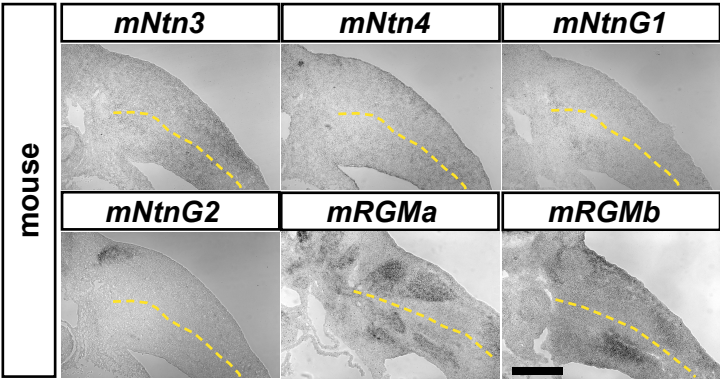

B

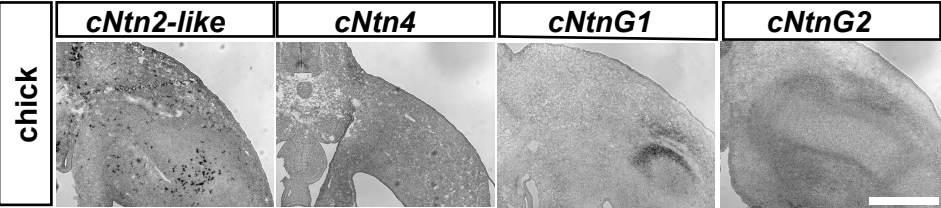

C

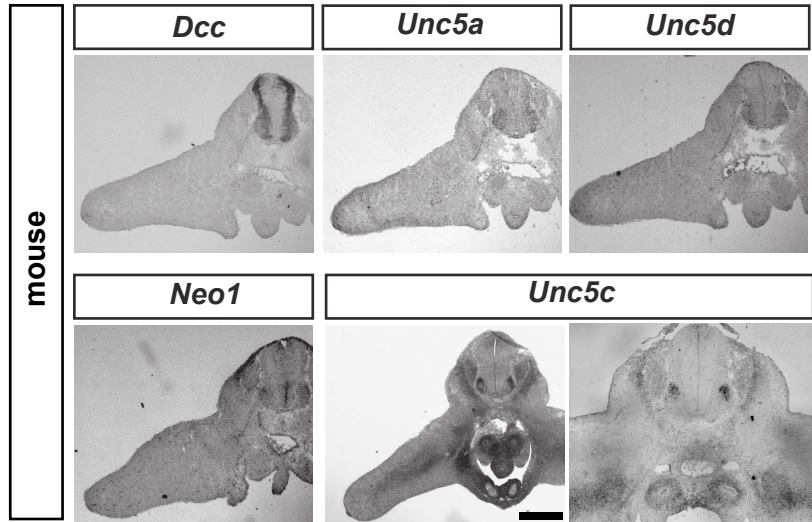

D

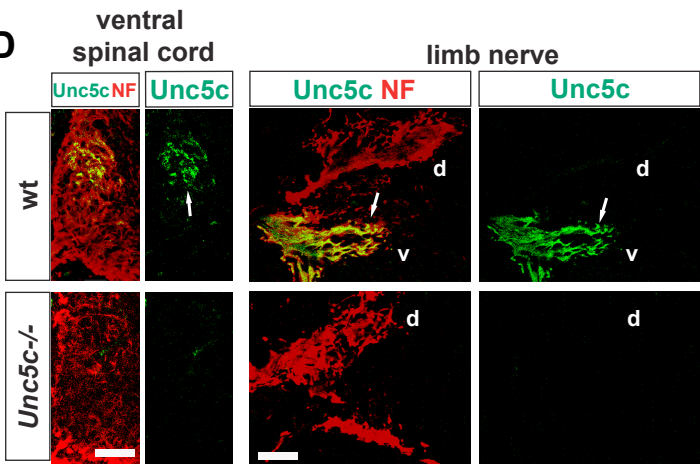

E

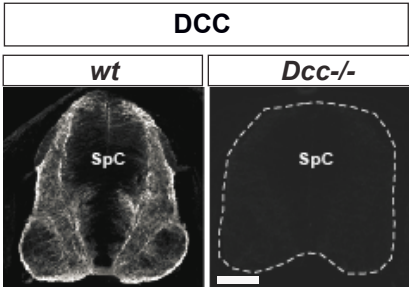

F

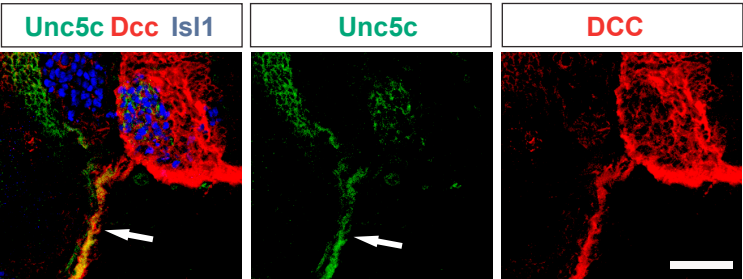

G

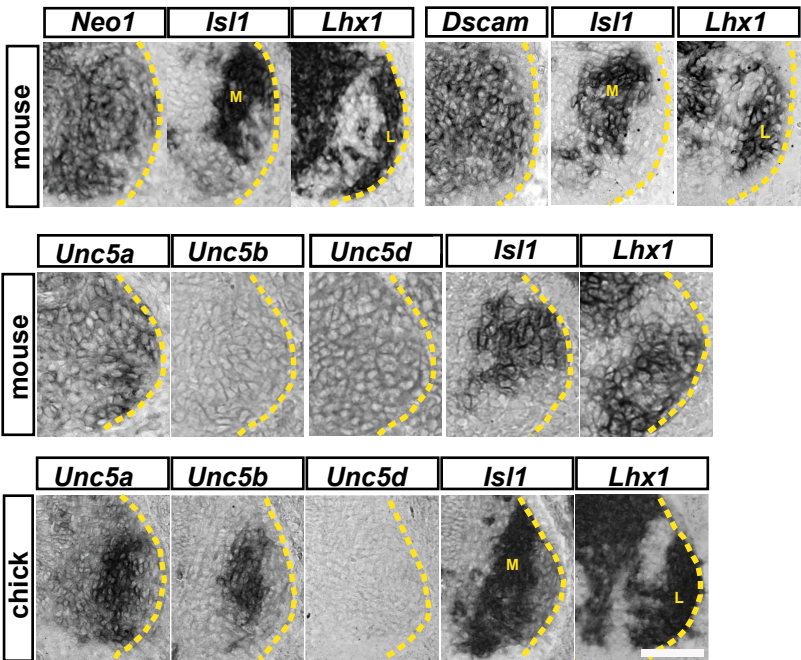

Supplement: supp [file elife_poa_e10841_Figure_1_Figure_Supplement_1.pdf › elife_poa_e10841_Figure_1_Figure_Supplement_1.pdf]

Figure 2 - Figure supplement 1

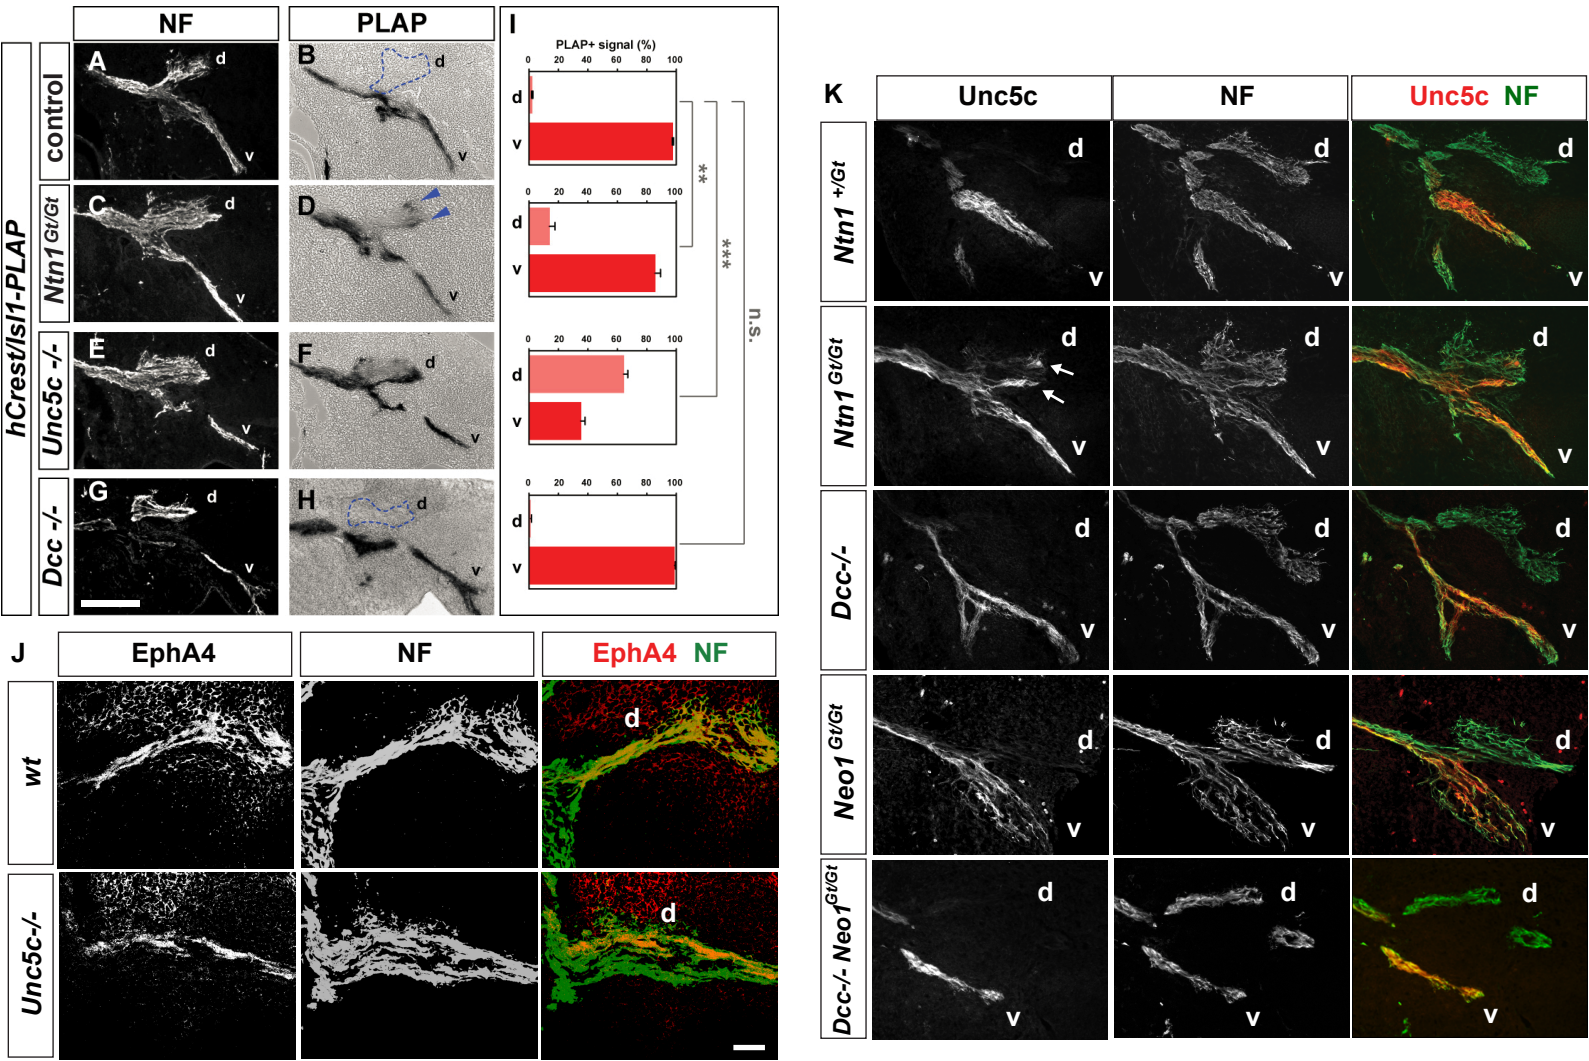

Supplement: supp [file elife_poa_e10841_Figure_2_Figure_Supplement_1.pdf › elife_poa_e10841_Figure_2_Figure_Supplement_1.pdf]

Figure 2 - Figure supplement 2

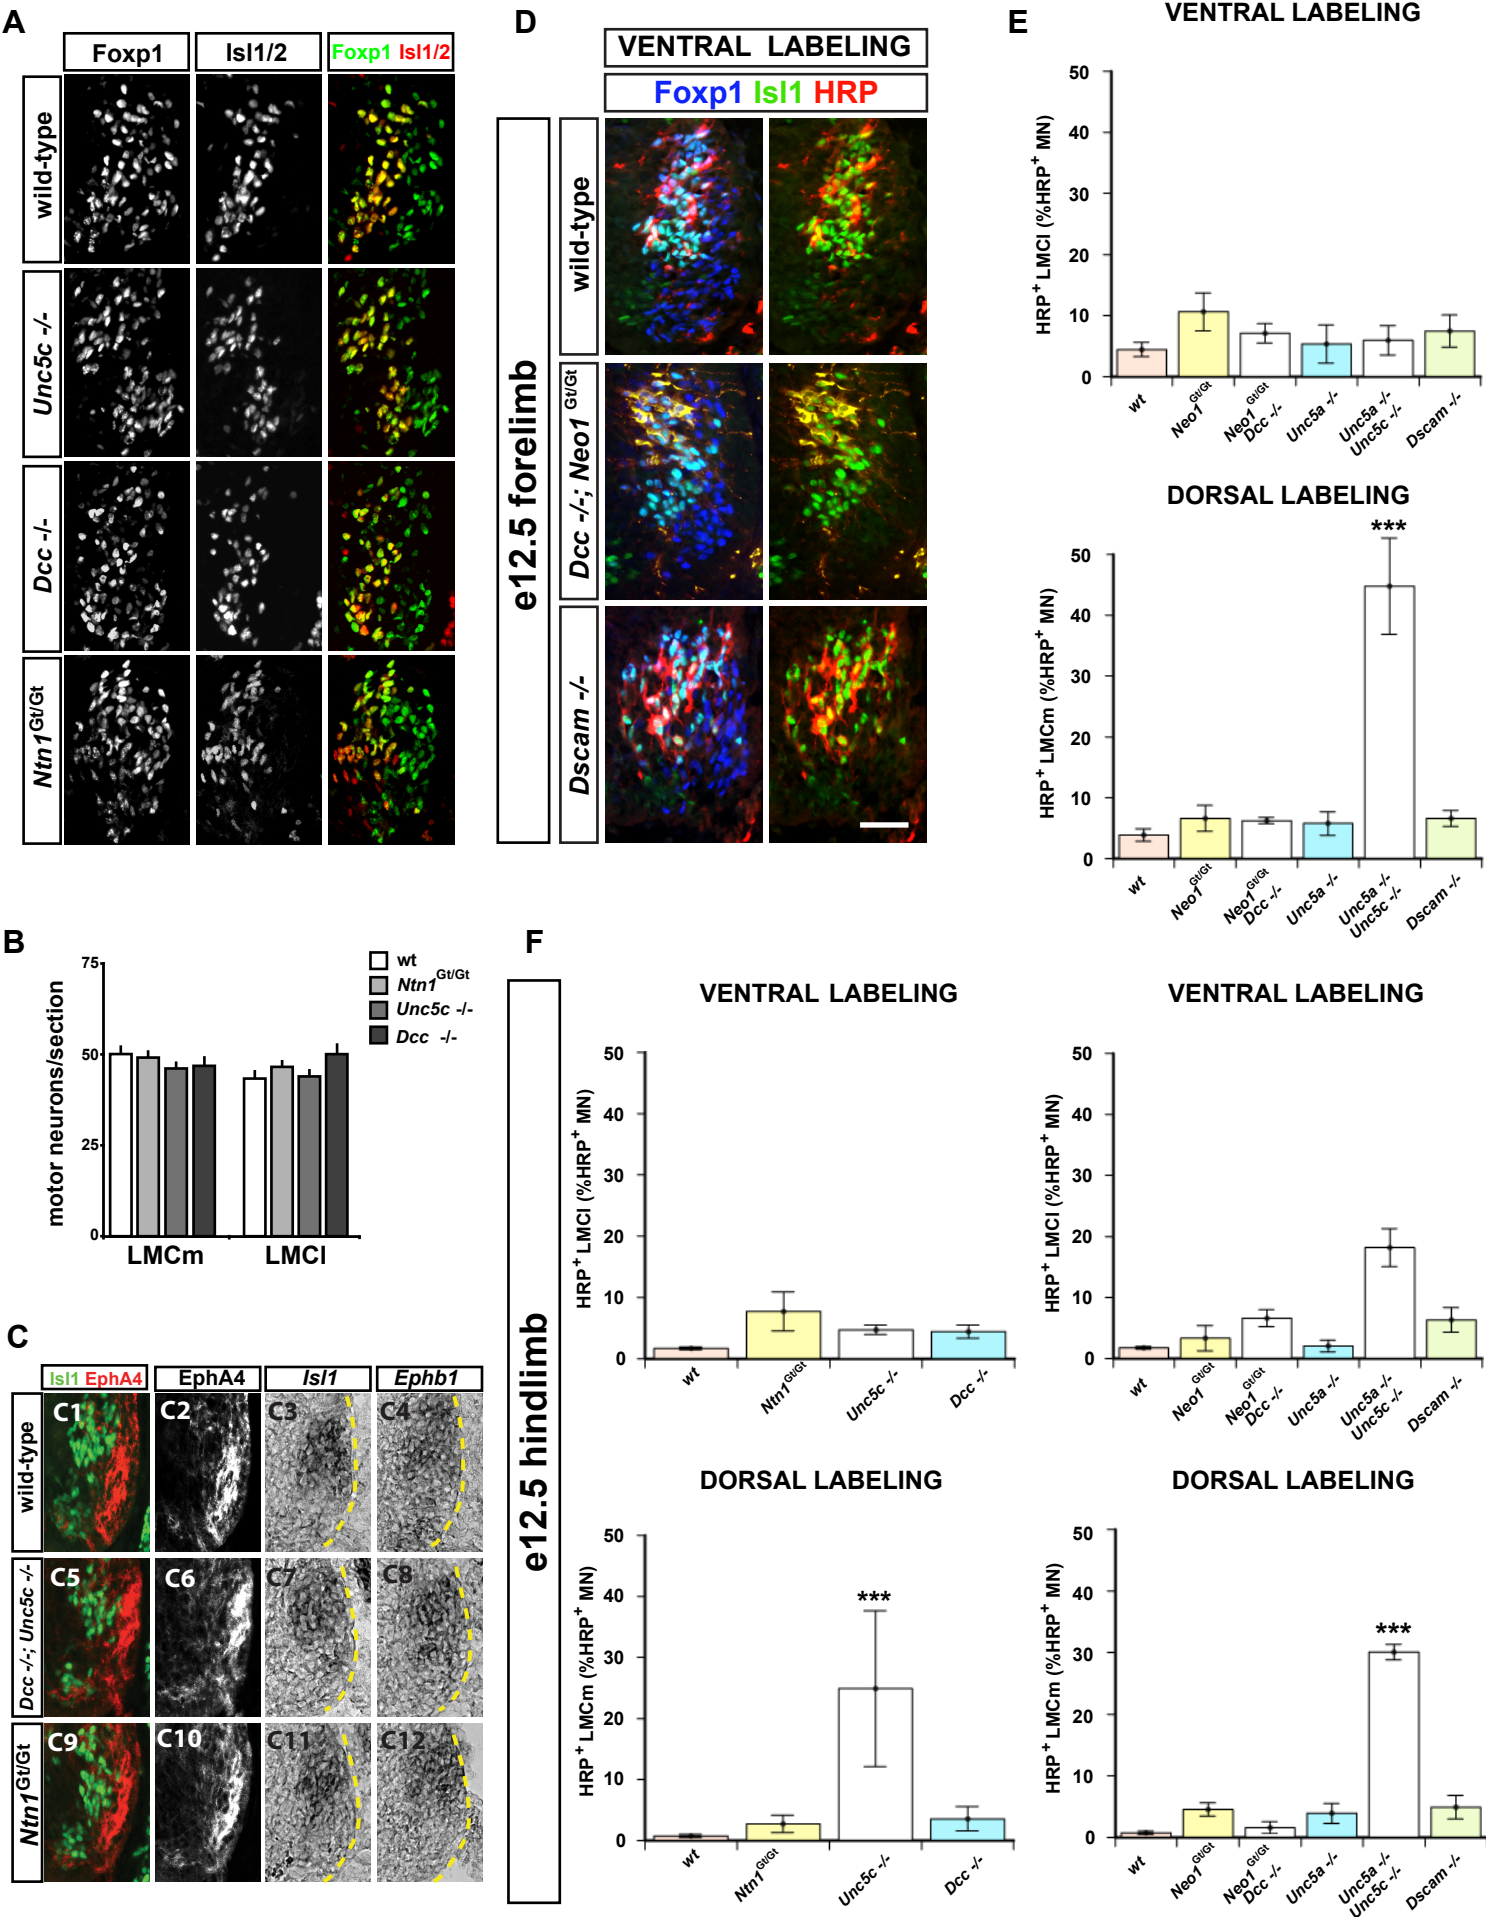

Supplement: supp [file elife_poa_e10841_Figure_2_Figure_Supplement_2.pdf › elife_poa_e10841_Figure_2_Figure_Supplement_2.pdf]

Figure 3 - Figure Supplement 1

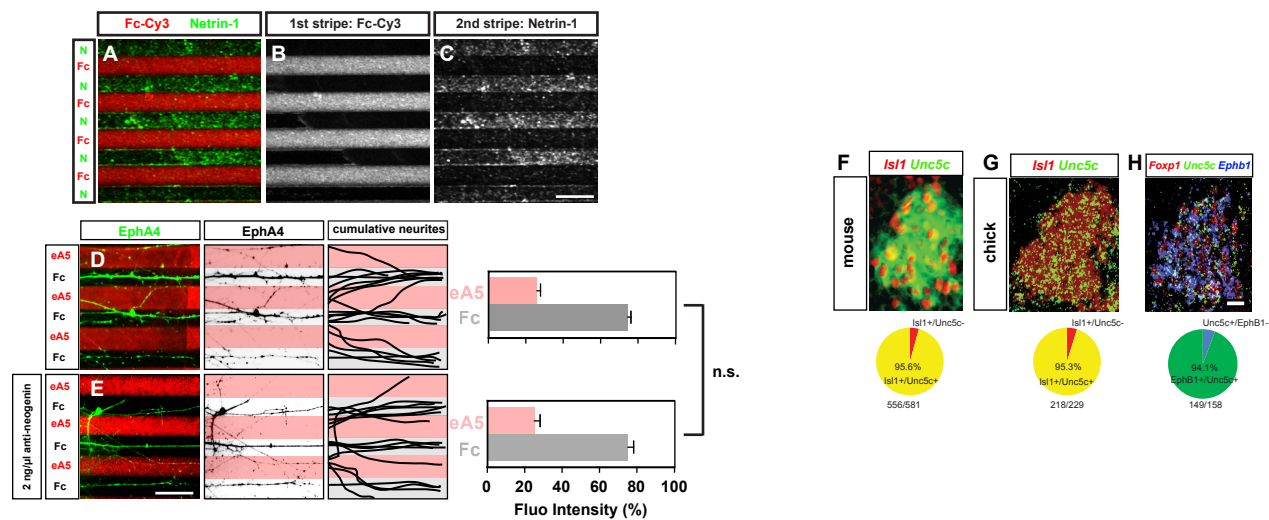

Supplement: supp [file elife_poa_e10841_Figure_3_Figure_Supplement_1.pdf › elife_poa_e10841_Figure_3_Figure_Supplement_1.pdf]

# Figure 4 - Figure Supplement 1

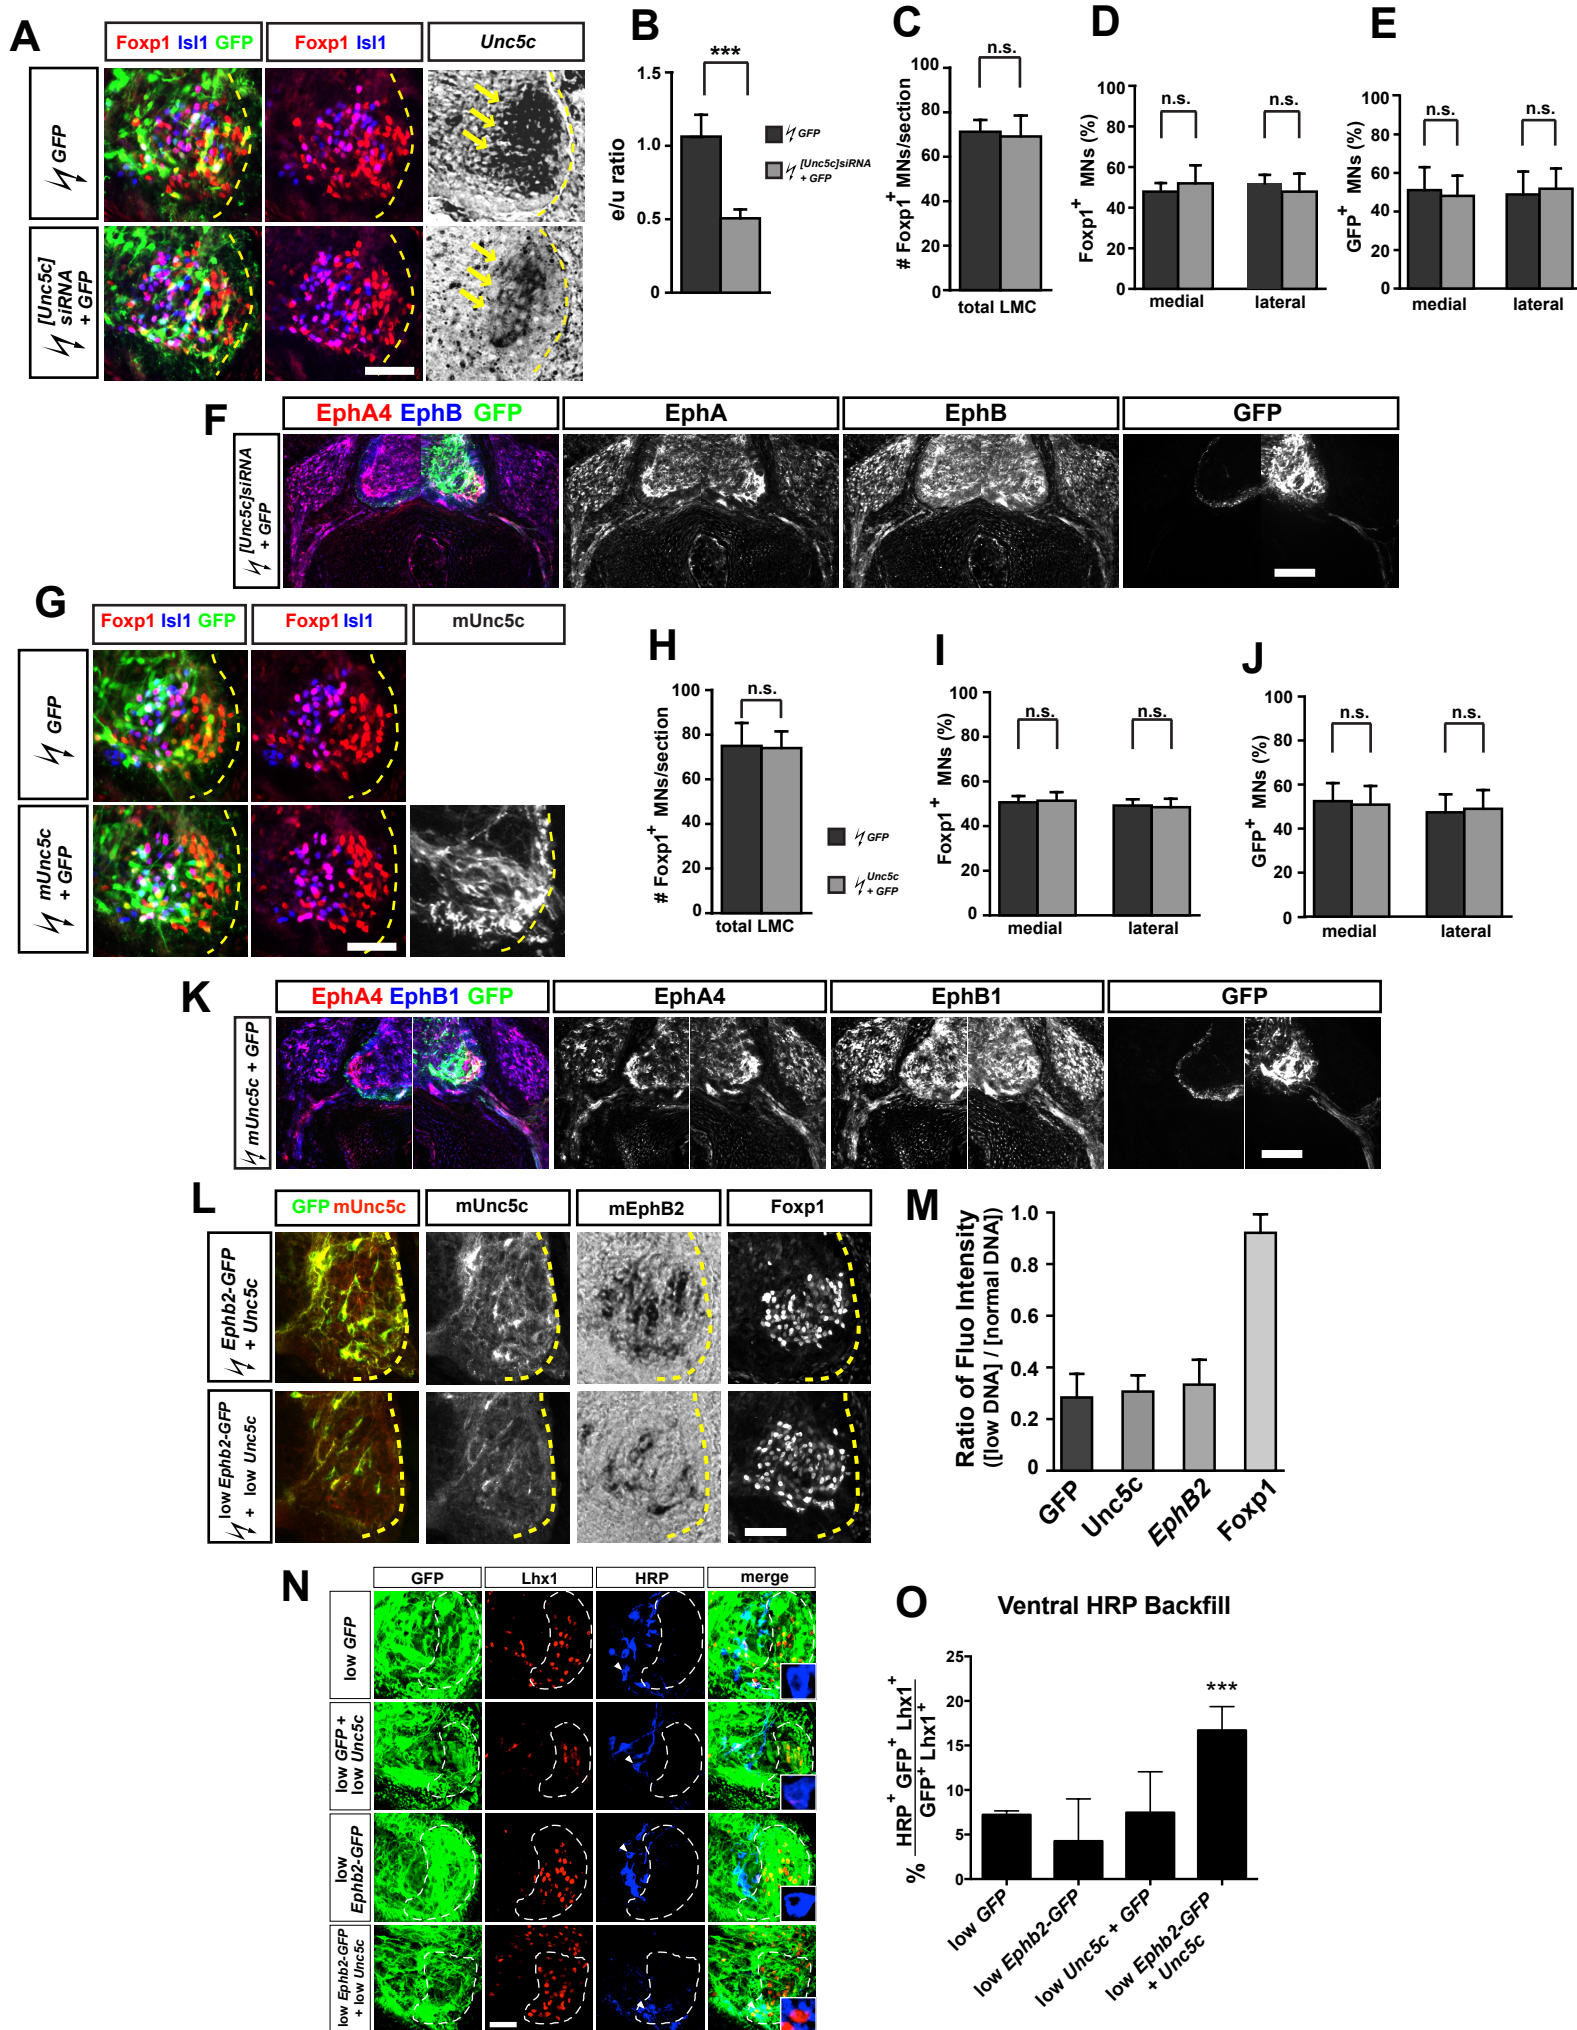

Supplement: supp [file elife_poa_e10841_Figure_4_Figure_Supplement_1.pdf › elife_poa_e10841_Figure_4_Figure_Supplement_1.pdf]

Figure 5 - Figure Supplement 1

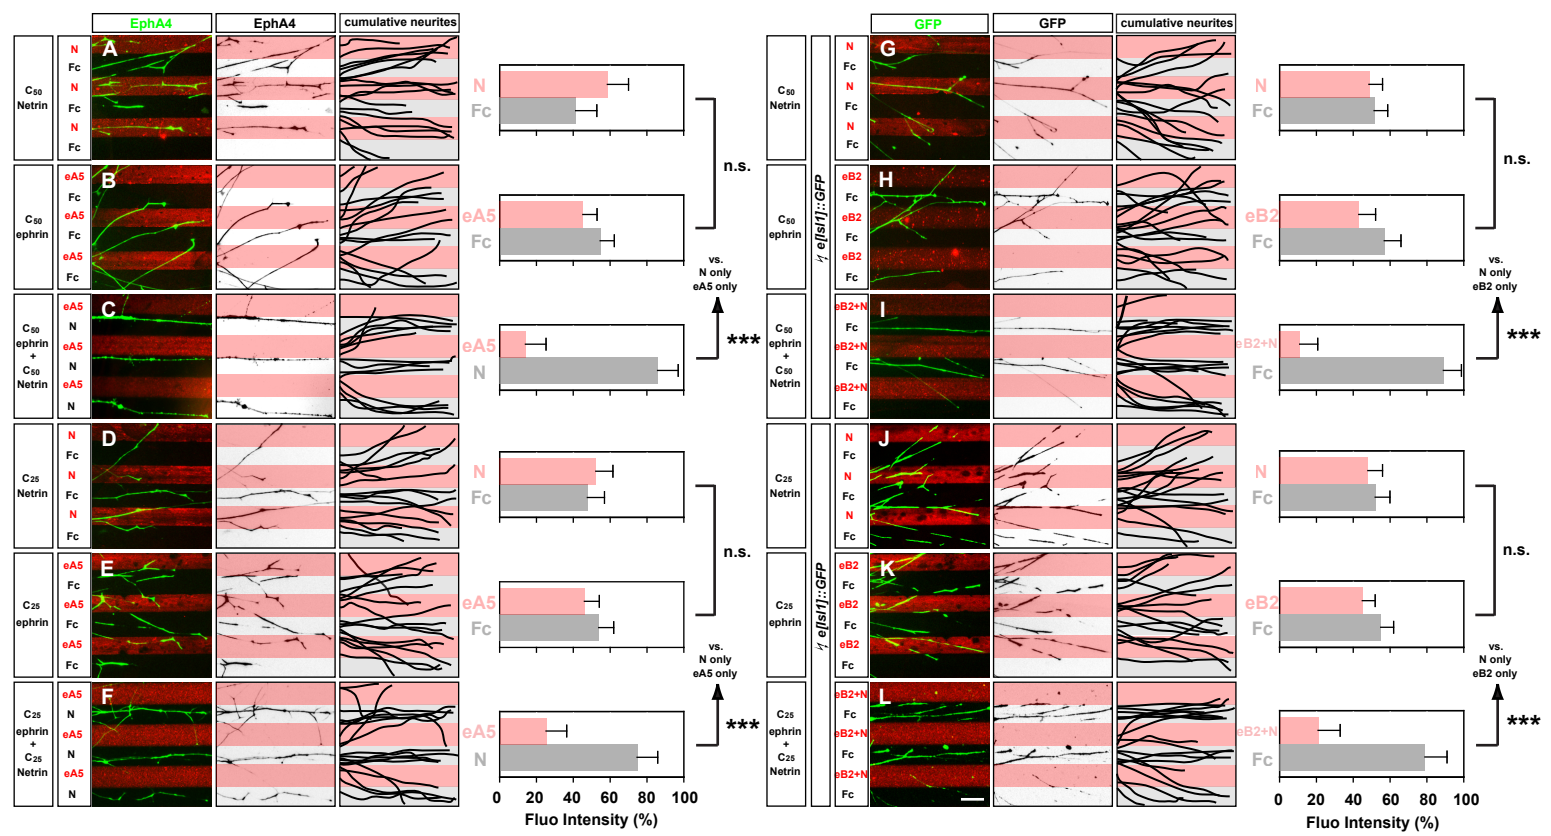

Supplement: supp [file elife_poa_e10841_Figure_5_Figure_Supplement_1.pdf › elife_poa_e10841_Figure_5_Figure_Supplement_1.pdf]

Figure 6 - Figure Supplement 1

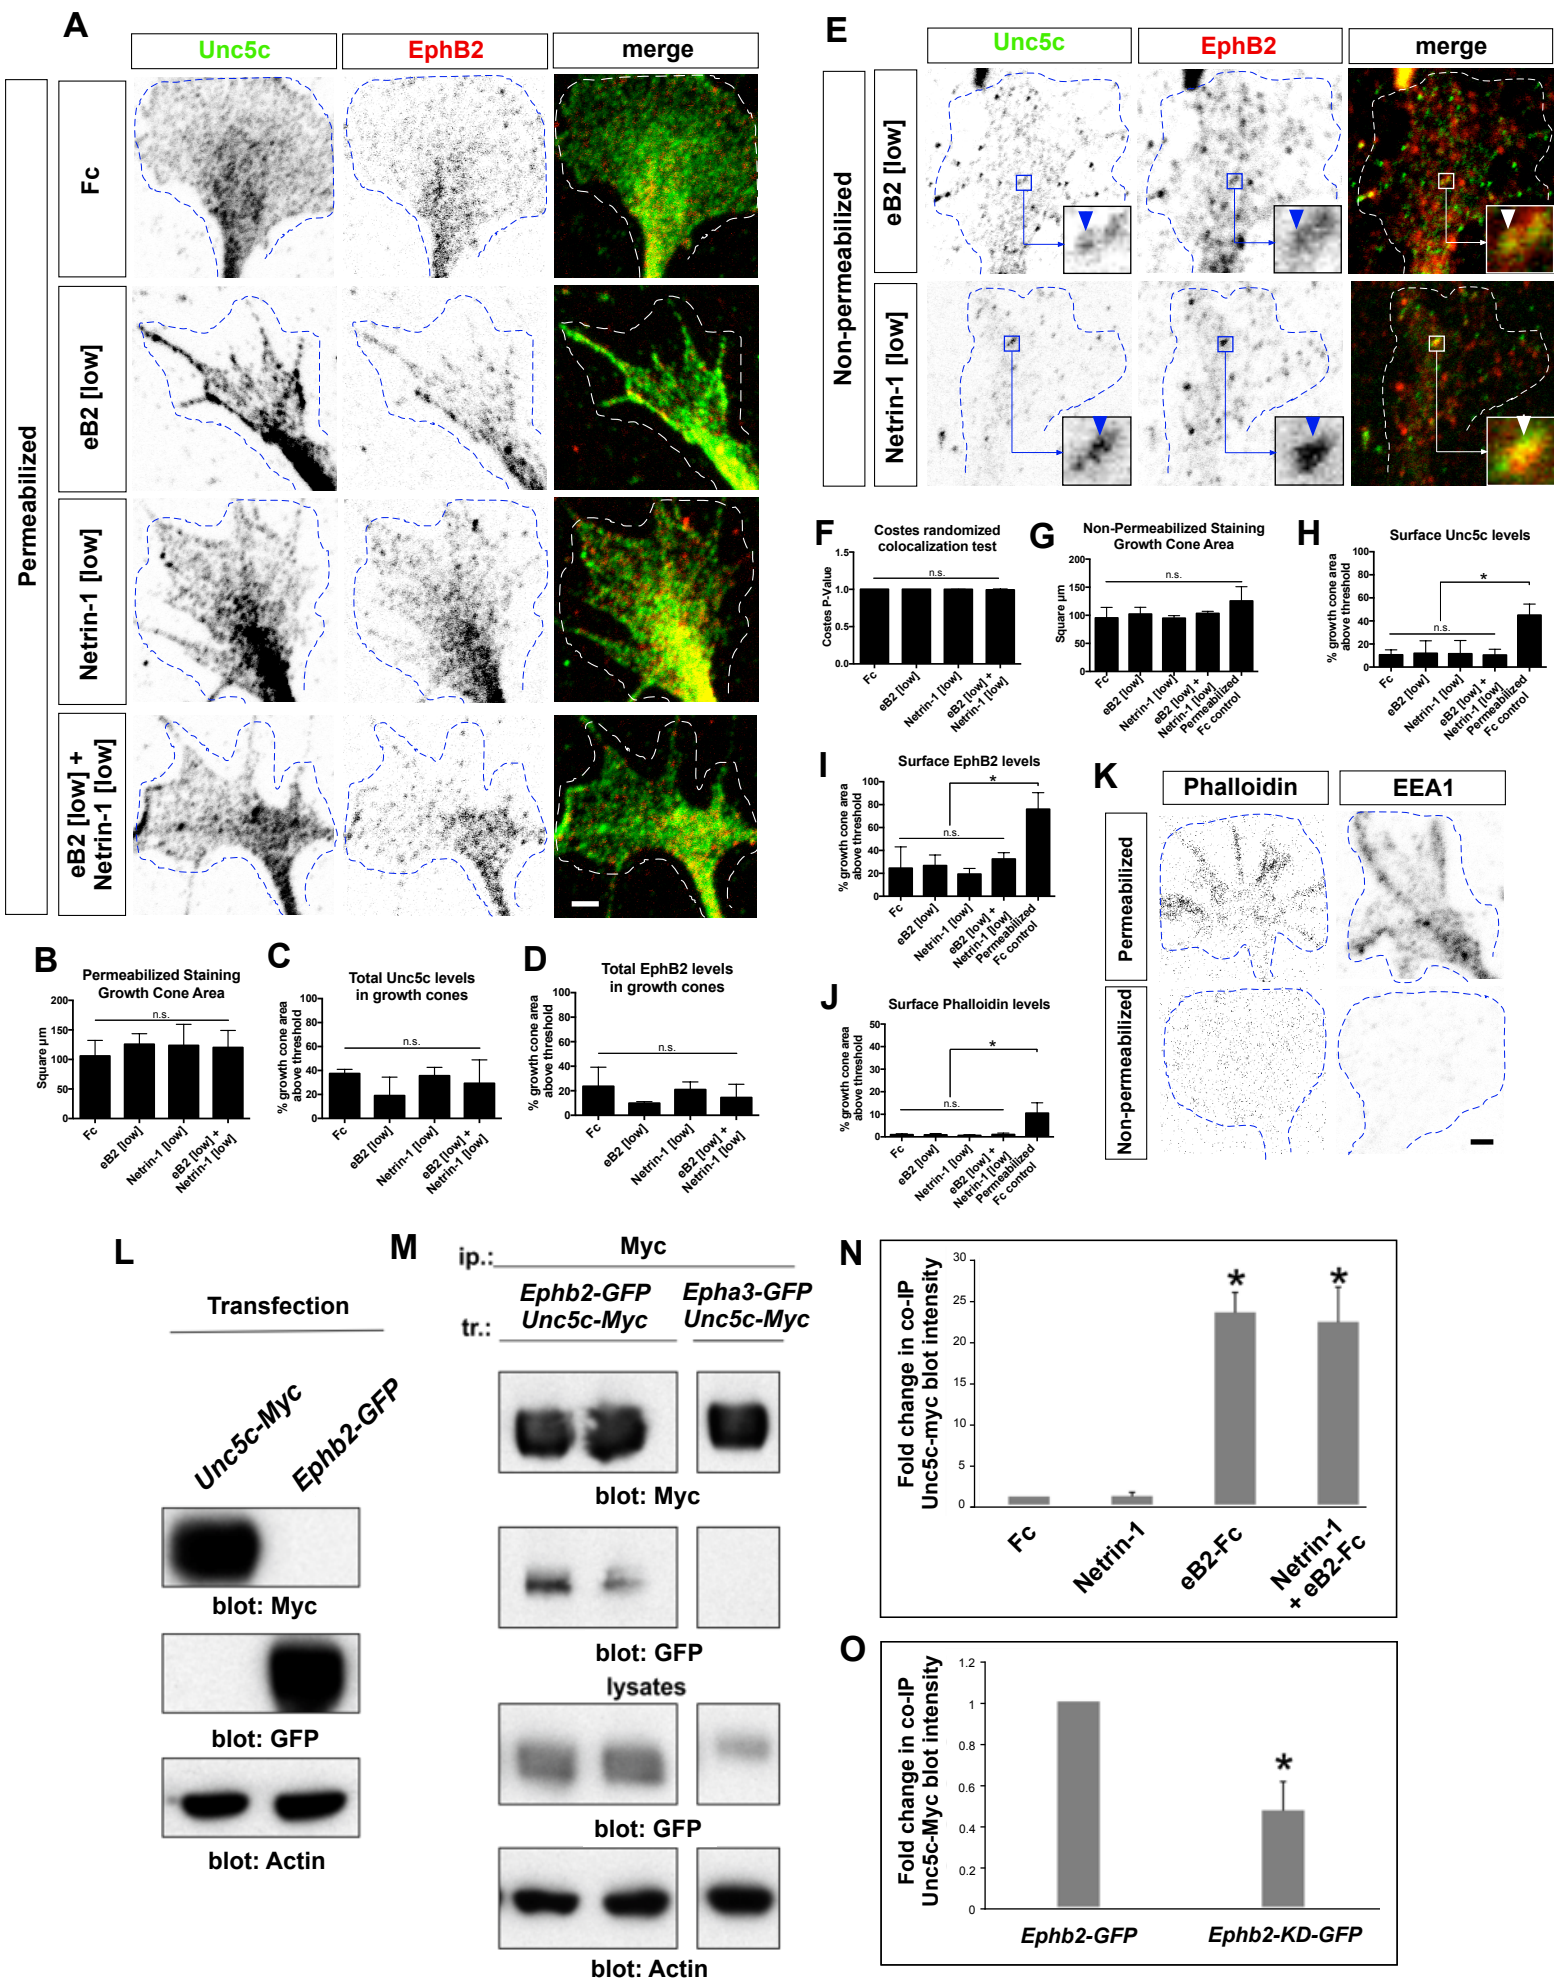

Supplement: supp [file elife_poa_e10841_Figure_6_Figure_Supplement_1.pdf › elife_poa_e10841_Figure_6_Figure_Supplement_1.pdf]

Figure 7 - Figure Supplement 1

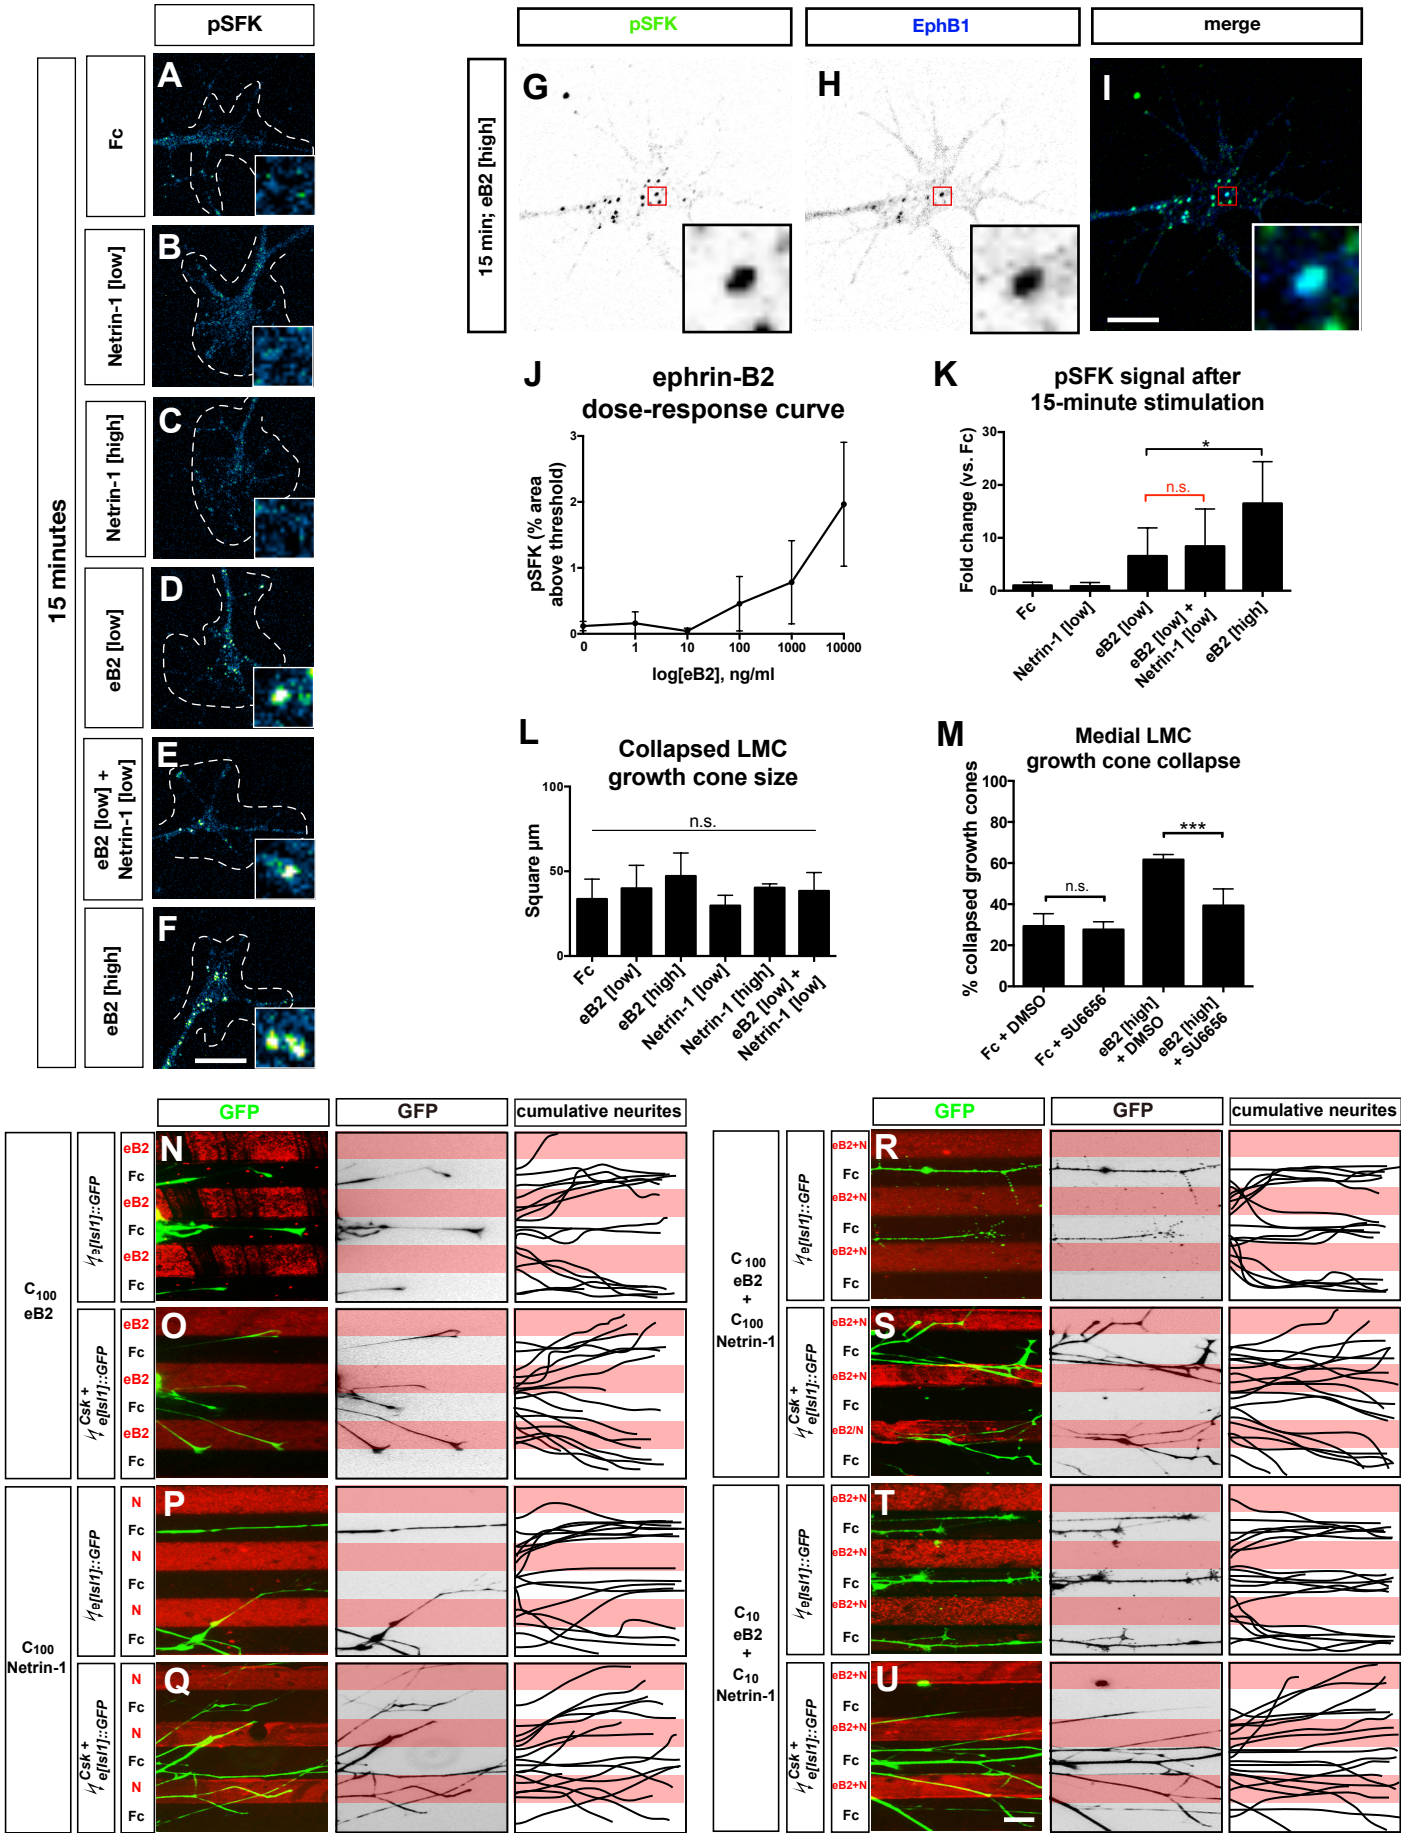

Supplement: supp [file elife_poa_e10841_Figure_7_Figure_Supplement_1.pdf › elife_poa_e10841_Figure_7_Figure_Supplement_1.pdf]
